# Supplementary material
Source: publisher figshare collection journal article supplement (https://acs.figshare.com/ndownloader/files/4105150)

# Supporting Information

## A Novel Amine Receptor Based on the Binol Scaffold Functions as a Highly Effective Chiral Shift Reagent for Carboxylic Acids

Qingzhu Ma,<sup>a</sup> Minshan Ma,<sup>a</sup> Hongying Tian,<sup>a</sup> Xiaoxia Ye,<sup>b</sup> Hongping Xiao,<sup>a</sup>

Lian-hui Chen,<sup>a</sup> \* and Xinxiang Lei<sup>a</sup> \*

*College of Chemistry & Materials Engineering, Wenzhou University, Wenzhou 325035, P. R. China;*<sup>a</sup>

*Wenzhou Medical College, Wenzhou 325035, P. R. China.*<sup>b</sup>

Email: [siocchenlh@yahoo.com.cn](mailto:siocchenlh@yahoo.com.cn), [xinxianglei@gmail.com](mailto:xinxianglei@gmail.com)

|                                                                                                                                                                       |     |
|-----------------------------------------------------------------------------------------------------------------------------------------------------------------------|-----|
| General information.....                                                                                                                                              | S2  |
| Synthetic Procedures of Py-Binol 1-2 .....                                                                                                                            | S2  |
| Figure S1: <sup>1</sup> H NMR (300 MHz, CDCl <sub>3</sub> , TMS) of Py-Binol 1-2.....                                                                                 | S3  |
| Figure S2: <sup>13</sup> C NMR(125 MHz, CDCl <sub>3</sub> ) of Py-Binol 1-2.....                                                                                      | S4  |
| Synthesis of Py-Binol 1-3 .....                                                                                                                                       | S4  |
| Figure S3: <sup>1</sup> H NMR (300 MHz, CDCl <sub>3</sub> , TMS) of Py-Binol 1-3.....                                                                                 | S5  |
| Figure S4: <sup>13</sup> C NMR(125 MHz, CDCl <sub>3</sub> ) of Py-Binol 1-3.....                                                                                      | S6  |
| Synthesis of ( <i>R, R</i> )-Py-Binol 1-4.....                                                                                                                        | S6  |
| Figure S5: <sup>1</sup> H NMR (500 MHz, <i>d</i> <sub>6</sub> -DMSO) of ( <i>R, R</i> )-Py-Binol 1-4.....                                                             | S7  |
| Figure S6: <sup>13</sup> C NMR(125 MHz, CDCl <sub>3</sub> ) of ( <i>R, R</i> )-Py-Binol 1-4.....                                                                      | S8  |
| Figure S7: HPLC of Boc protected Py-Binol 1-4, determination of d.e.....                                                                                              | S9  |
| Synthesis of receptor ( <i>R, R</i> )-Py-Binol 1.....                                                                                                                 | S10 |
| Figure S8: <sup>1</sup> H NMR (500 MHz, CDCl <sub>3</sub> , TMS) of ( <i>R, R</i> )-Py-Binol 1.....                                                                   | S11 |
| Figure S9: <sup>13</sup> C NMR (125 MHz, <i>d</i> <sub>6</sub> -DMSO) of ( <i>R, R</i> )-Py-Binol 1.....                                                              | S11 |
| Figure S10: X-ray of D-(+)- Camphorsulfonic Acid salt of ( <i>R, R</i> )-Py-Binol 1, determination of the absolute configuration.....                                 | S12 |
| NMR Experiments.....                                                                                                                                                  | S12 |
| Figure S11. The overlaid <sup>1</sup> H NMR spectra of free mandelic acid (blue), and the 1:1 mixture of compound ( <i>R, R</i> )-Py-Binol 1-4 and mandelic acid..... | S13 |
| NMR Enantiodifferentiation of carboxylic acids 1-13 by CSR.....                                                                                                       | S13 |

**General Information:** All synthetic operations were performed under air atmosphere and all solvent was used without purification, unless otherwise stated. **Py-binol 1-1** was prepared from commercial **R-Binol** according to reference (7a, text), others Chemicals were either purchased or purified by standard techniques. Melting points were obtained with a Yuhua X-5 micromelting point apparatus and uncorrected. Optical rotation was tested in PolAAR-3005 polarimeter and uncorrected.  $^1\text{H}$  NMR and  $^{13}\text{C}$  NMR spectra were measured on 300 or 500 MHz Bruker spectrometer in  $\text{CDCl}_3$  solutions with tetramethylsilane (TMS).  $J$  values are given in Hz. Column chromatography was performed using Silica gel (300-400 mesh). de of **Py-binol 1-4** was checked by HPLC, and absolute configuration of **(R, R)-Py-Binol 1** was confirmed with X-ray. Infrared spectra was measured on a Bruker Vector-55 spectrometer. HRMS was recorded with a Waters Micromass GCT Premier instrument.

#### Synthetic Procedures of Py-Binol 1-2

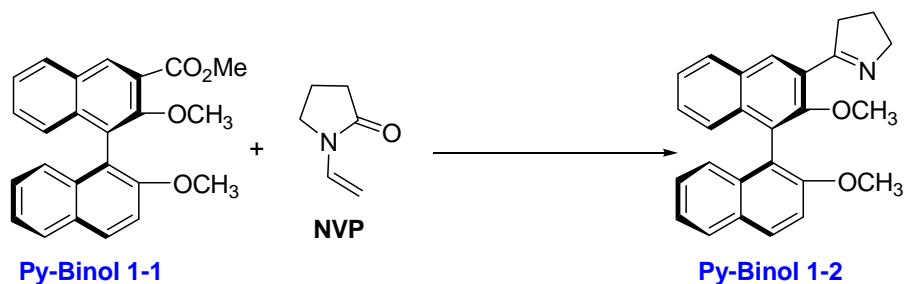

LiHMDS (171 mL, 171 mmol) was added to stirring freshly distilled N-vinylpyrrolidinone (19.98 g, 180 mmol) in THF (50 mL, anhydrous) at  $-78\text{ }^\circ\text{C}$ . The mixture was stirred for 1 h and a solution of **Py-Binol 1-1** (33.5 g, 90 mmol) in THF was added dropwise. After the reaction mixture was stirred at  $-78\text{ }^\circ\text{C}$  for 2-3 h, the reaction was allowed to warm to room temperature naturally and stirred overnight. Concentrated HCl (30 mL), diluted with  $\text{H}_2\text{O}$  (50 mL), was added, and the THF was removed on a rotary evaporator. The mixture is added slowly to refluxing 6 N hydrochloric acid (150 mL) and heated under reflux overnight, cooled to room temperature. The pH of solution was adjusted to 12 with concentrated aqueous NaOH (ice-bath cooling), which resulted in precipitation of the crude product (**Py-Binol 1-2**), and then extracted with methylene chloride (2 X 250 mL). The combined extracts were washed with  $\text{H}_2\text{O}$  (100 mL), dried with  $\text{MgSO}_4$  and concentrated under reduced pressure to afford 21 g (60%) of crude product which can

be used directly without further purification.

White solid. mp: 59-60 °C.  $[\alpha]_D^{20}$ : +64.6 (c 1.76, CHCl<sub>3</sub>). IR (KBr):  $\nu$  1715, 1619, 1593, 1508, 1355, 1266, 1248, 1088, 810, 751 cm<sup>-1</sup>. <sup>1</sup>H NMR (300 MHz, CDCl<sub>3</sub>, TMS):  $\delta$ : 1.91-2.01 (m, 2H), 3.00 (t,  $J$  = 7.6 Hz, 2H), 3.25 (s, 3H), 3.67 (s, 3H), 3.98 (t,  $J$  = 7.6 Hz, 2H), 7.03 (dd,  $J_1$  = 7.8 Hz,  $J_2$  = 8.7 Hz, 2H), 7.13 (dd,  $J_1$  = 7.2 Hz,  $J_2$  = 7.8 Hz, 2H), 7.19-7.30 (m, 2H), 7.35 (d,  $J$  = 9.0 Hz, 1H), 7.76(d,  $J$  = 7.8 Hz, 1H), 7.83 (d,  $J$  = 7.8 Hz, 1H), 7.89 (d,  $J$  = 9.0 Hz, 1H), 8.26 (s, 1H). <sup>13</sup>C NMR (125 MHz, CDCl<sub>3</sub>):  $\delta$ : 23.29, 38.06, 56.48, 60.19, 61.12, 113.46, 118.72, 123.64, 125.08, 125.27, 125.37, 126.70, 127.23, 127.91, 128.74, 128.87, 128.98, 129.91, 130.26, 130.55, 133.90, 134.94, 154.45, 154.87, 175.29.. HRMS (ESI) calcd for C<sub>26</sub>H<sub>24</sub>NO<sub>2</sub> (M+H)<sup>+</sup>: 382.1807; Found: 382.1802.

**Figure S1: <sup>1</sup>H NMR (300 MHz, CDCl<sub>3</sub>, TMS) of Py-Binol 1-2.**

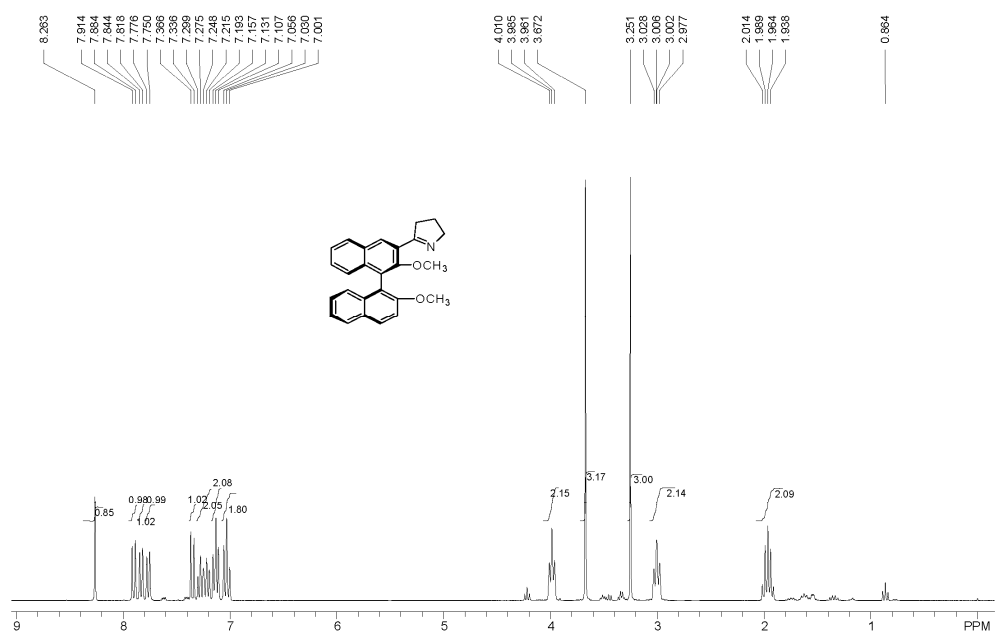

Figure S2:  $^{13}\text{C}$  NMR (125 MHz,  $\text{CDCl}_3$ ) of Py-Binol 1-2.

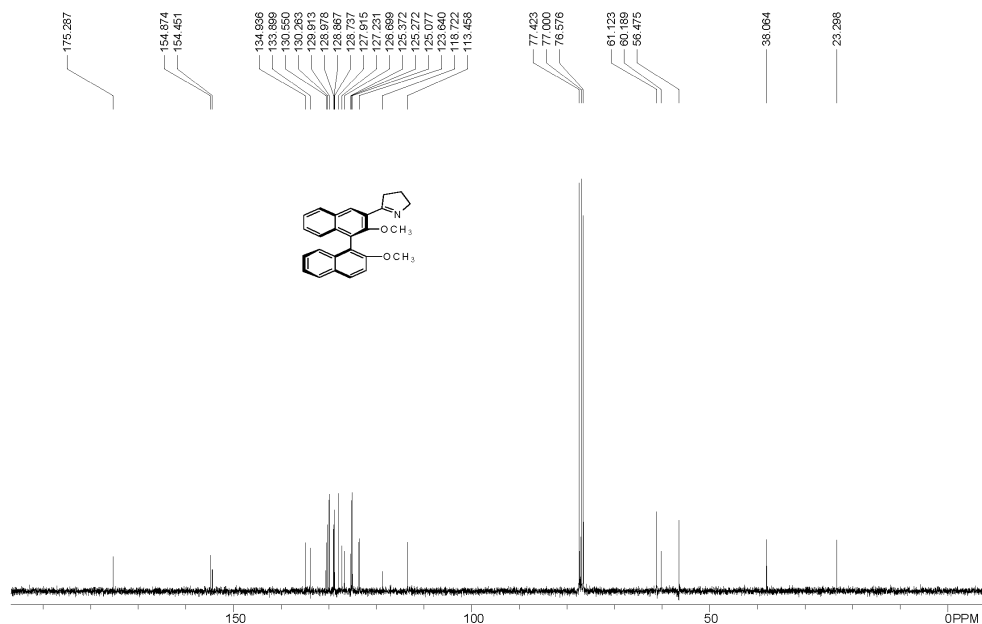

### Synthesis of Py-Binol 1-3

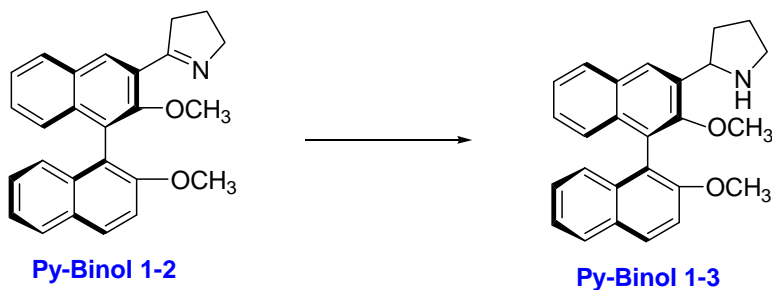

$\text{NaBH}_4$  (2.84 g, 75 mmol) was added portionwise over 20 min, with vigorous stirring, to a solution of **Py-Binol 1-2** (11.5 g, 30 mmol) in methanol (50 mL) cooled to  $-40^\circ\text{C}$ . After warmed to room temperature slowly, most of the solvent was removed with a rotary evaporator.  $\text{H}_2\text{O}$  (100 mL) was added, and the solution was made basic with  $\text{NaOH}$  and extracted with methylene chloride (2 x 150 mL). The combined extract was washed with saturated aqueous  $\text{NaCl}$  (100 mL), dried over  $\text{MgSO}_4$ , concentrated on a rotary evaporator to give 9.9 g (86%) of crude product (**Py-Binol 1-3**) as yellow solid. The crude product (**Py-Binol 1-3**) was purified by flash column chromatography on silica gel (eluent:  $\text{CH}_2\text{Cl}_2$  :  $\text{CH}_3\text{OH}$ , from 40:1 to 20:1) to give the product (9.21 g, 93%) as a white solid.

White solid. mp: 77-79 °C.  $[\alpha]_D^{20}$ : +77.1 (c 1.05, CHCl<sub>3</sub>). IR (KBr):  $\nu$  2935, 1710, 1592, 1507, 1455, 1358, 1248, 1148, 1087, 809, 749 cm<sup>-1</sup>. <sup>1</sup>H NMR (300 MHz, CDCl<sub>3</sub>, TMS):  $\delta$ : 1.76-2.1 (m, 3H), 2.23 (s, 1H), 2.31-2.40 (m, 1H), 3.03-3.12 (m, 1H), 3.26-3.31 (m, 1H), 3.33 (s, 1.3H), 3.34 (s, 1.7H), 3.77 (s, 1.7H), 3.79 (s, 1.3H), 4.55-4.62 (m, 1H), 7.08-7.36 (m, 6H), 7.44 (d,  $J = 9.0$  Hz, 1H), 7.85 (d,  $J = 7.8$  Hz, 2H), 7.98 (d,  $J = 9.0$  Hz, 1H), 8.07 (s, 1H). <sup>13</sup>C NMR (125 MHz, CDCl<sub>3</sub>):  $\delta$ : 25.24, 25.27, 33.08, 33.39, 46.65, 56.48, 56.56, 57.69, 57.84, 58.31, 60.68, 60.70, 113.50, 113.62, 119.36, 119.40, 123.66, 124.15, 124.67, 125.12, 125.22, 125.38, 125.79, 125.83, 126.07, 126.11, 126.70, 127.85, 127.88, 127.95, 128.00, 129.05, 129.85, 130.58, 130.61, 133.31, 133.96, 135.95, 154.74, 154.83, 154.90, 154.93. HRMS (ESI) calcd for C<sub>26</sub>H<sub>26</sub>NO<sub>2</sub> (M+H)<sup>+</sup>384.1964; Found: 384.1958.

**Figure S3: <sup>1</sup>H NMR (300 MHz, CDCl<sub>3</sub>, TMS) of Py-Binol 1-3.**

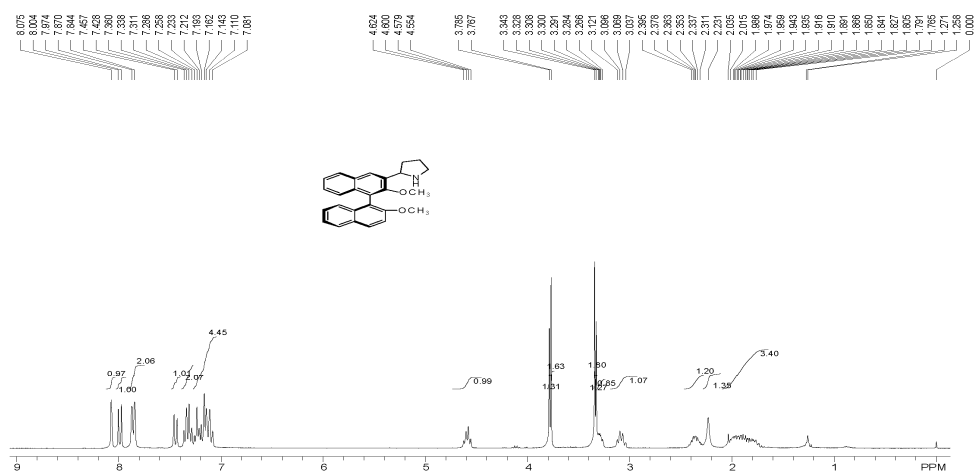

**Figure S4:**  $^{13}\text{C}$  NMR (125 MHz,  $\text{CDCl}_3$ ) of **Py-Binol 1-3**.

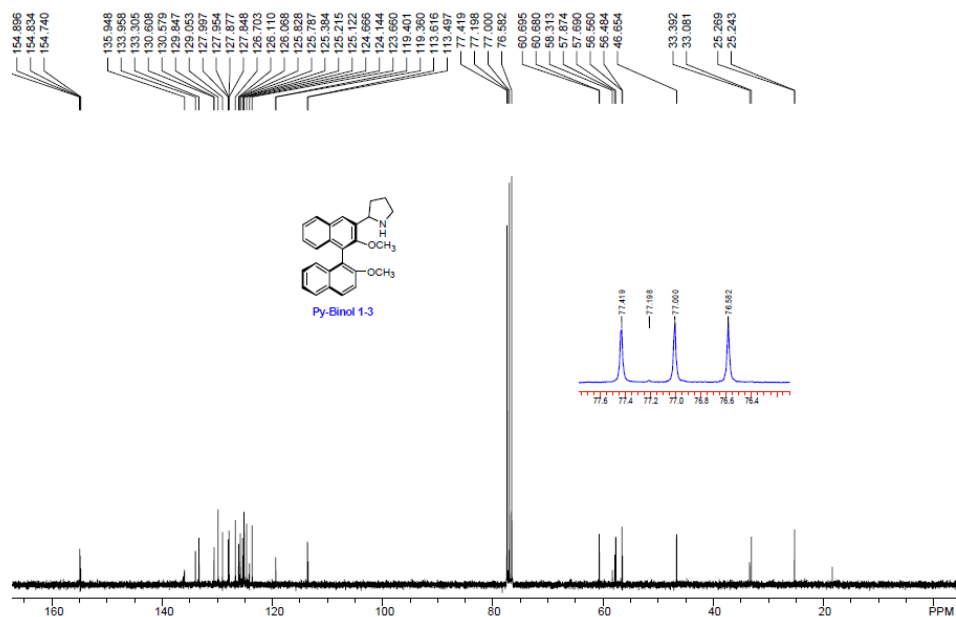

#### Synthesis of (*R,R*)-Py-Binol 1-4

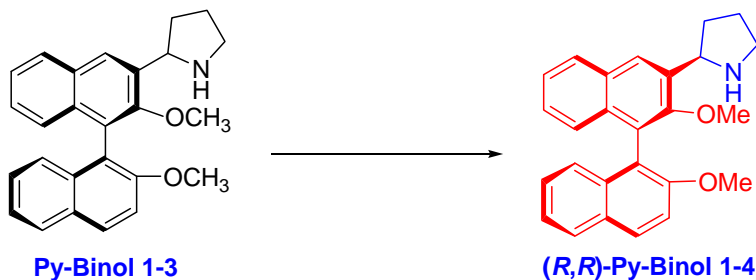

L-Tartaric acid (7.96 g, 53 mmol) was added to the solution of **Py-Binol 1-3** (20.3 g, 53 mmol) in EtOH (200 mL, g/v = 1:10), and heated to reflux for 1-2 h, then cooled to room temperature naturally, white salt precipitated, after filtration, the salt was solvled in water and made basic with 10% aqueous NaOH, extracted with methylene chloride (2 x 100 mL). The combined extract was washed with 100 mL of saturated aqueous NaCl, dried over  $\text{MgSO}_4$ , concentrated on a rotary evaporator to give 5.5 g product of (*R,R*)-**Py-Binol 1-4** as white solid with over 99% de.

White solid. mp: 78-79 °C.  $[\alpha]_D^{20}$ : +84.4 (c 1.92,  $\text{CHCl}_3$ ). IR (KBr):  $\nu$  2935, 1710, 1592,

1507, 1455, 1358, 1248, 1148, 1087, 809, 749  $\text{cm}^{-1}$ .  $^1\text{H}$  NMR (500 MHz,  $d_6$ -DMSO):  $\delta$ : 1.58-1.66 (m, 1H), 1.78-1.95 (m, 2H), 2.26-2.34 (m, 1H), 2.97-3.02 (m, 1H), 3.15-3.20 (m, 1H), 3.30 (s, 3H), 3.30-3.4 (br, 1H), 3.81 (s, 3H), 4.52 (t,  $J = 7.5$  Hz, 1H), 6.95 (dd,  $J = 9.0$ ,  $J = 8.7$  Hz, 2H), 7.22 (dd,  $J = 7.0$  Hz,  $J = 1.0$  Hz, 1H), 7.25-7.28 (m, 1H), 7.34-7.41 (m, 2H), 7.69 (d,  $J = 9.0$  Hz, 1H), 7.96 (d,  $J = 8.0$  Hz, 1H), 7.99 (d,  $J = 8.0$  Hz, 1H), 8.16 (d,  $J = 9.0$  Hz, 1H), 8.21 (s, 1H).  $^{13}\text{C}$  NMR(125 MHz,  $\text{CDCl}_3$ ):  $\delta$ : 25.27, 33.17, 46.68, 56.53, 57.51, 60.67, 113.59, 119.42, 123.61, 124.13, 124.60, 125.10, 125.35, 125.72, 125.96, 126.66, 127.82, 127.96, 129.02, 129.79, 130.59, 133.21, 133.94, 136.41, 154.86, 154.90. HRMS (ESI) calcd for  $\text{C}_{26}\text{H}_{26}\text{NO}_2$  ( $\text{M}+\text{H}$ ) $^+$  384.1964; Found: 384.1958.

**Figure S5:  $^1\text{H}$  NMR (500 MHz,  $d_6$ -DMSO) of (*R,R*)-Py-Binol 1-4.**

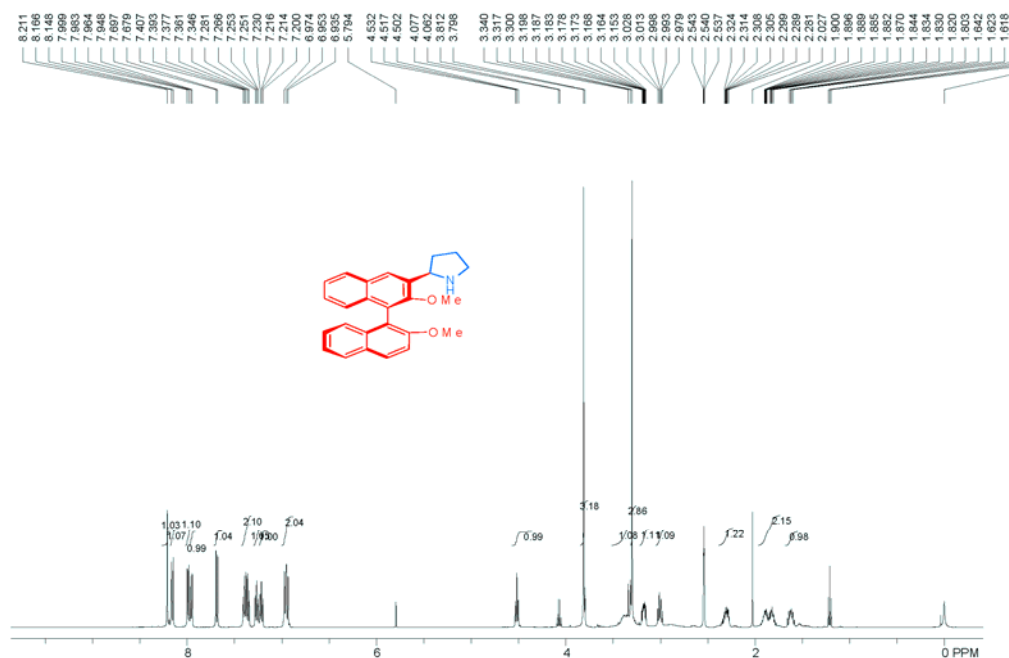

Figure S6:  $^{13}\text{C}$  NMR (125 MHz,  $\text{CDCl}_3$ ) of (*R,R*)-Py-Binol 1-4

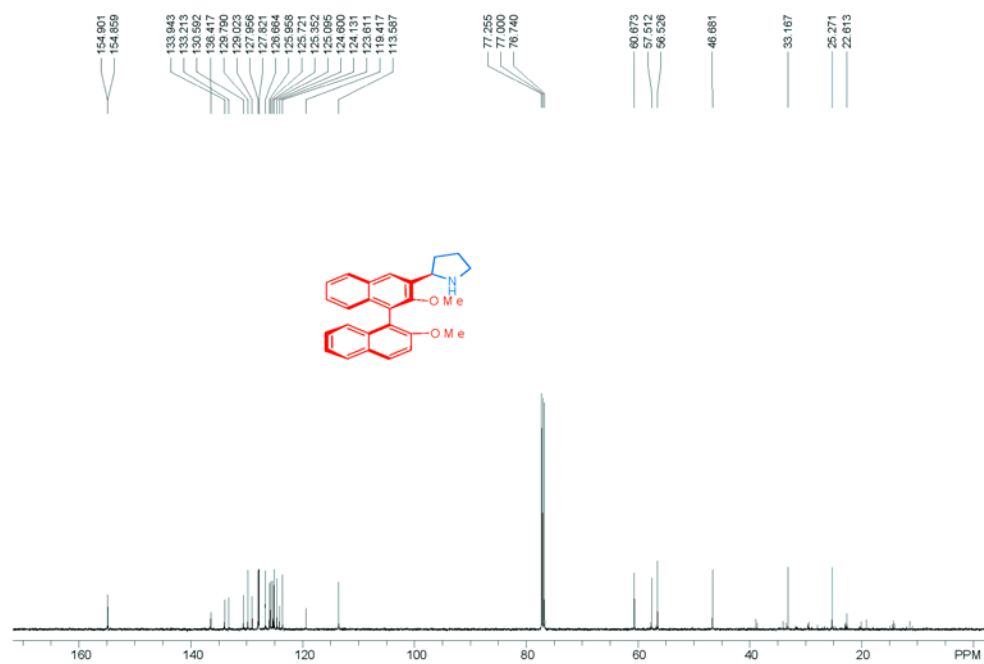

Determination of *de* for **Py-Binol 1-4**. Boc group before chiral HPLC was used. Chiral AD column;  $\lambda = 254$  nm; eluent: Hexane/Isopropanol = 98/2; Flow rate: 0.7 mL/min;  $t_1 = 8.38$  min;  $t_2 = 10.88$  min.



**Figure S7: HPLC of Boc protected Py-Binol 1-4, determination of de.**

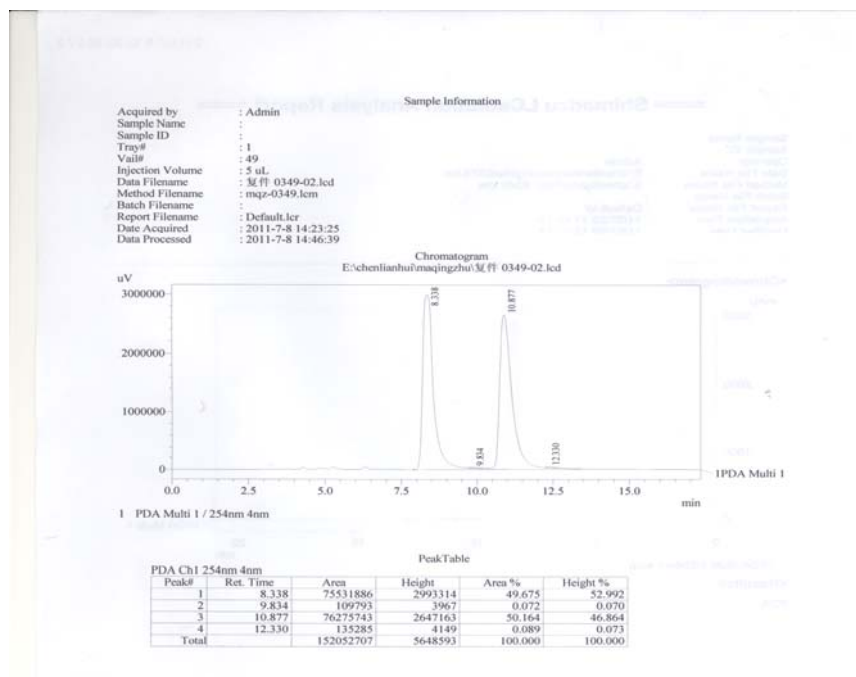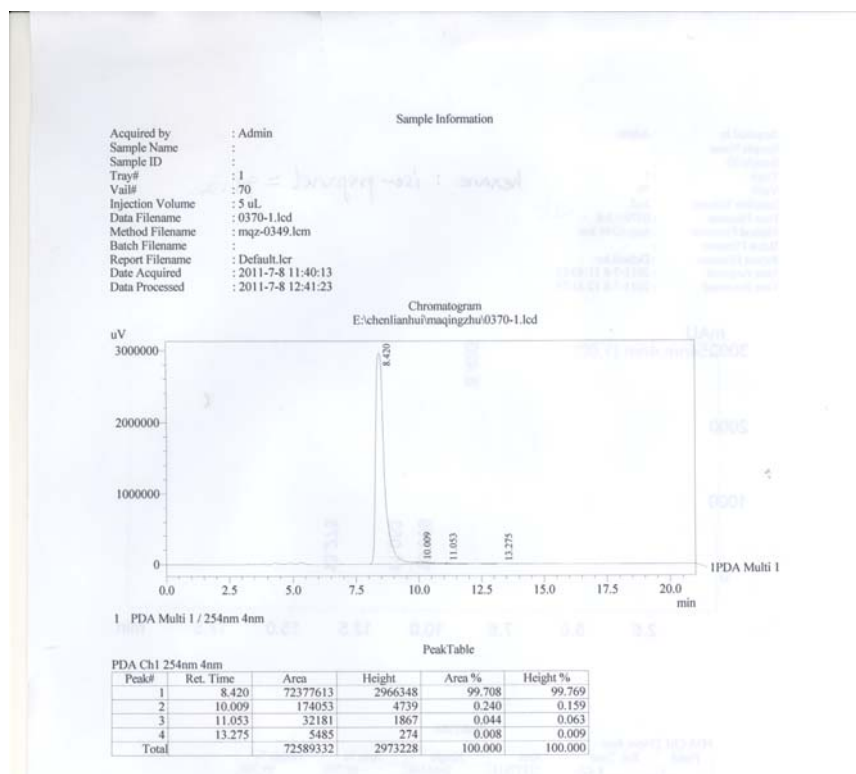

### Synthesis of receptor (*R,R*)-Py-Binol 1

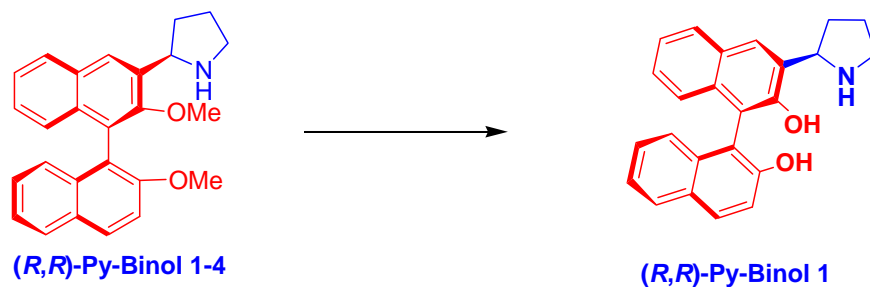

**(*R,R*)-Py-Binol 1-4** (1.3 g, 3.4 mmol) was dissolved in dry  $\text{CH}_2\text{Cl}_2$  (20 mL) and cooled to  $-40^\circ\text{C}$ ,  $\text{BBr}_3$  (1 mL, 10 mmol) was added slowly, and the reaction mixture was stirred for 4-5 h at  $-40^\circ\text{C}$ .  $\text{H}_2\text{O}$  (30 mL) was carefully added. The phases were separated, extracted with  $\text{CH}_2\text{Cl}_2$  (2 x 50 mL). The combined extract organic phase was washed with  $\text{H}_2\text{O}$  (50 mL) and saturated aqueous  $\text{NaCl}$  (50 mL), dried over  $\text{Na}_2\text{SO}_4$ , and concentrated on a rotary evaporator to give the crude product **(*R,R*)-Py-Binol 1**, then the crude product was purified by flash column chromatography on silica gel to give the product (eluent:  $\text{CH}_2\text{Cl}_2$  :  $\text{CH}_3\text{OH}$ , from 40:1 to 20:1) as a white solid. (1.13 g, 87%).

white solid. mp:  $101\text{-}103^\circ\text{C}$ .  $[\alpha]_{\text{D}}^{20}$ :  $+43.5$  (c 1.75,  $\text{CHCl}_3$ ). IR (KBr):  $\nu$  3027, 2928, 1716, 1710, 1424, 1371, 1358, 1221, 1199  $\text{cm}^{-1}$ .  $^1\text{H}$ NMR (500 MHz,  $\text{CDCl}_3$ , TMS):  $\delta$ : 1.18 (s, 1H), 1.82-1.97 (m, 3H), 2.19-2.23 (m, 1H), 2.96-2.99 (m, 1H), 3.04-3.07 (m, 1H), 4.45-4.47 (m, 1H), 5.83 (br, 2H), 7.03 (d,  $J = 8.5$  Hz, 1H), 7.08-7.23 (m, 6H), 7.56 (s, 1H), 7.69 (d,  $J = 8.0$  Hz, 1H), 7.75-7.80 (m, 2H),  $^{13}\text{C}$  NMR (125 MHz, DMSO):  $\delta$ : 24.64, 33.97, 44.93, 62.27, 115.84, 116.25, 118.55, 121.86, 122.09, 123.99, 124.58, 125.14, 125.67, 126.02, 127.22, 127.45, 127.76, 128.07, 128.27, 128.86, 133.02, 134.23, 152.80, 155.14. HRMS (ESI) calcd for  $\text{C}_{24}\text{H}_{22}\text{NO}_2$  ( $\text{M}+\text{H}$ ) $^+$  356.1651; Found: 356.1645.

Figure S8:  $^1\text{H}$  NMR (500 MHz,  $\text{CDCl}_3$ , TMS) of (*R,R*)-Py-Binol 1

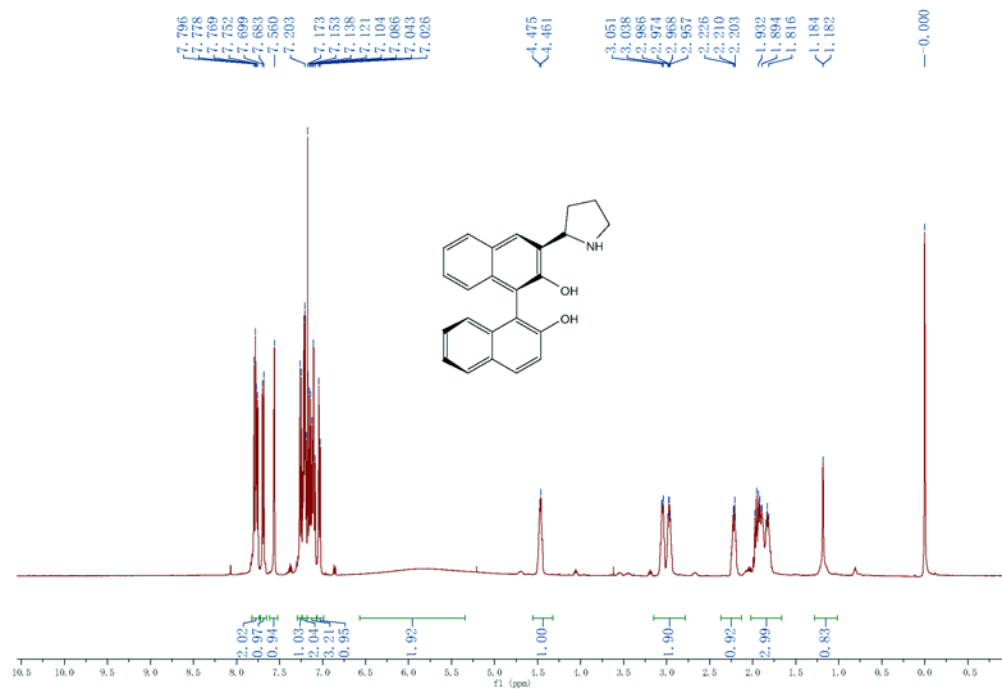

Figure S9:  $^{13}\text{C}$  NMR (125 MHz,  $d_6$ -DMSO) of (*R,R*)-Py-Binol 1

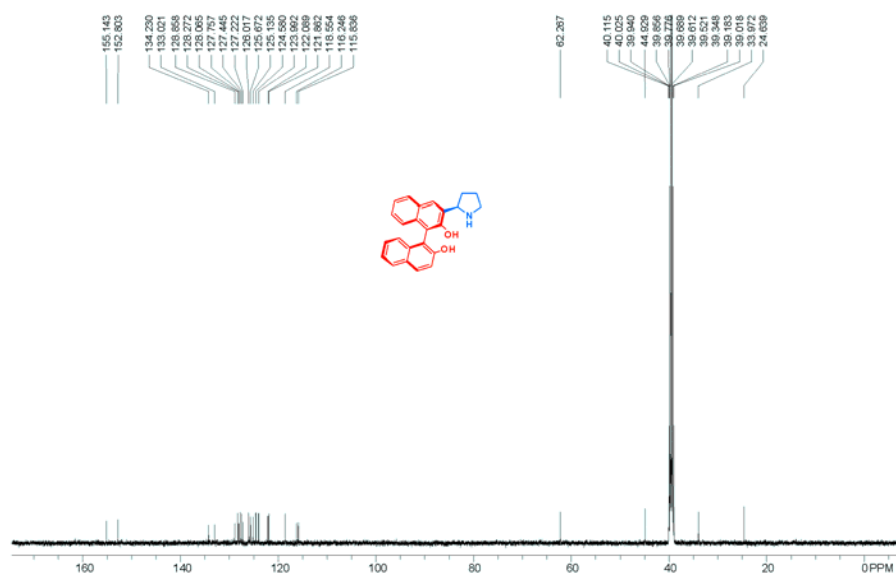

**Figure S10: X-ray of D-(+)- Camphorsulfonic Acid salt of (R, R)-Py-Binol 1, determination of the absolute configuration.**

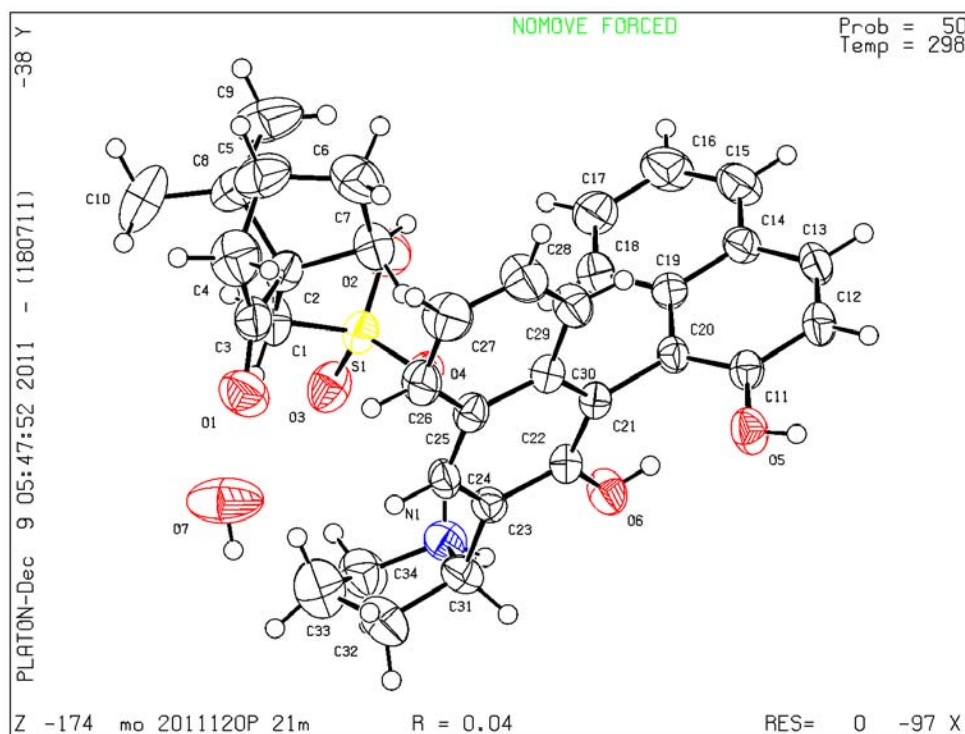

### NMR Experiments

NMR spectra were collected on a spectrometer 500 MHz for  $^1\text{H}$  NMR and 125 MHz for  $^{13}\text{C}$  NMR and reported as parts per million (ppm) from the internal standard TMS( solvent,  $\text{CDCl}_3$ ).

**Figure S11.** The overlaid  $^1\text{H}$  NMR spectra of free mandelic acid (blue), and the 1:1 mixture of compound (*R,R*)-Py-Binol 1-4 and mandelic acid (10 mM).

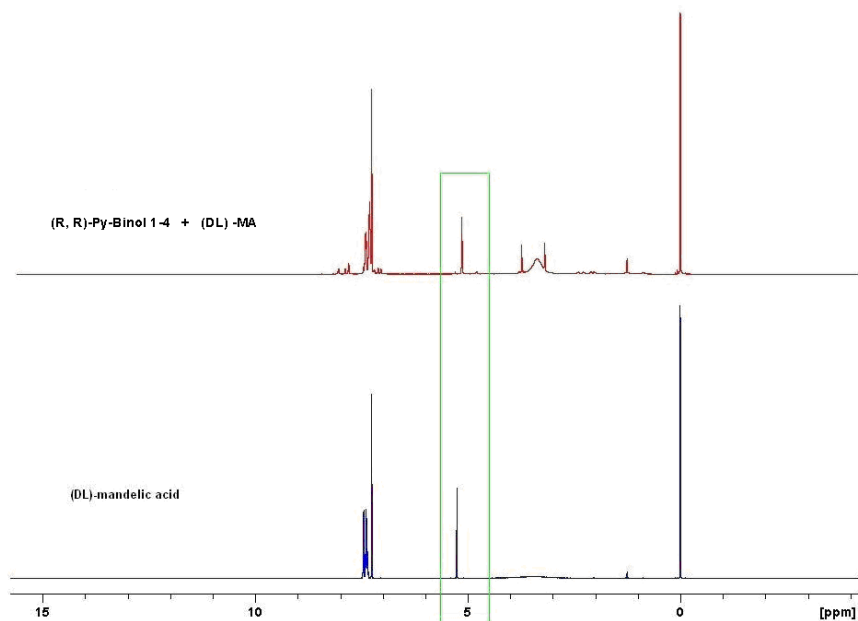

**NMR Enantiodifferentiation of carboxylic acids 1-13 (5 mM) by the receptor (10 mM).**

**Figure S12.**  $^1\text{H}$  NMR Spectra of CSR and carboxylic acid 1

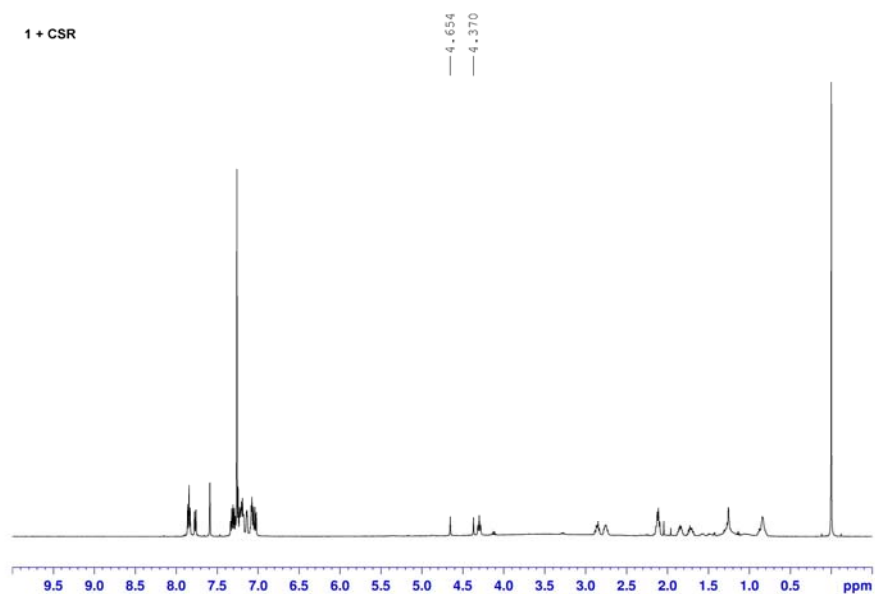

**Figure S13.  $^1\text{H}$  NMR Spectra of CSR and carboxylic acid 2**

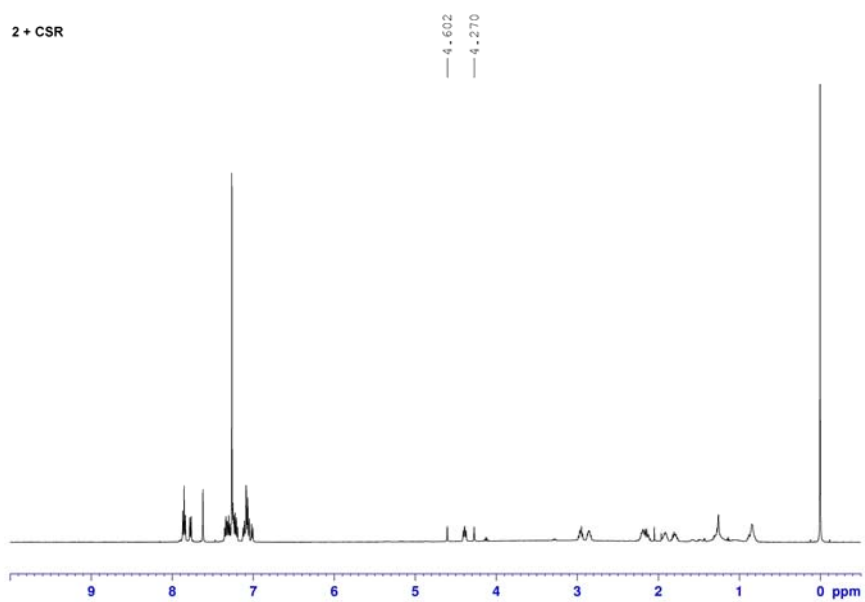

**Figure S14.  $^1\text{H}$  NMR Spectra of CSR and carboxylic acid 3**

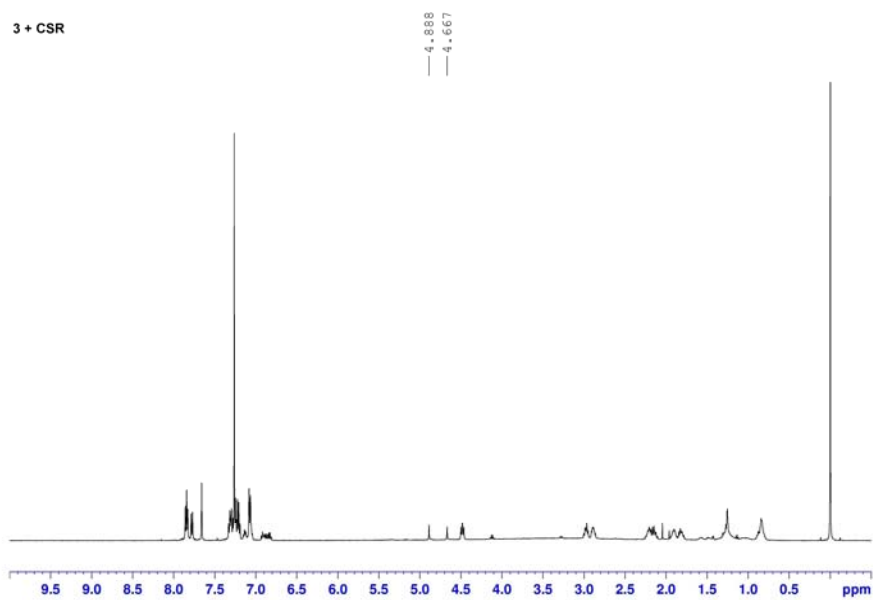

**Figure S15.  $^1\text{H}$  NMR Spectra of CSR and carboxylic acid 4**

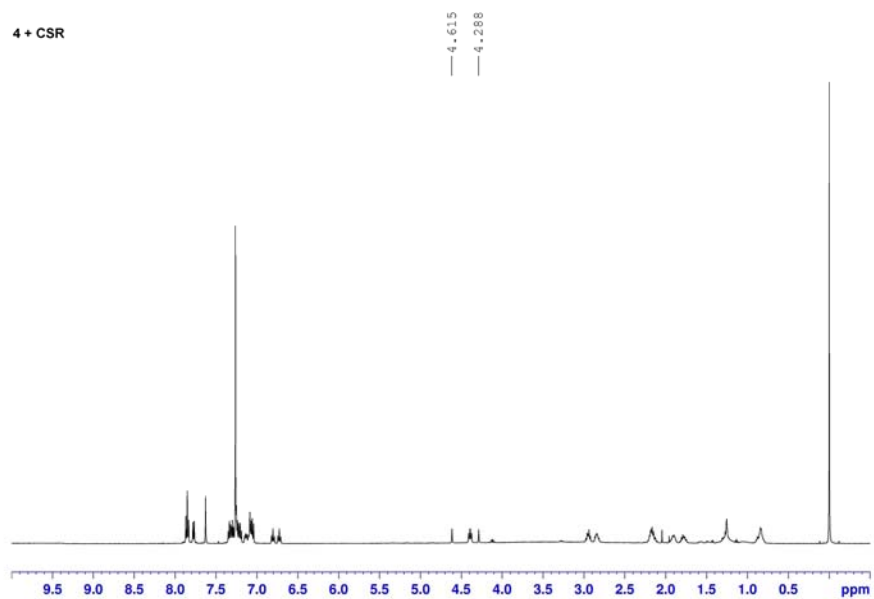

**Figure S16.  $^1\text{H}$  NMR Spectra of CSR and carboxylic acid 5**

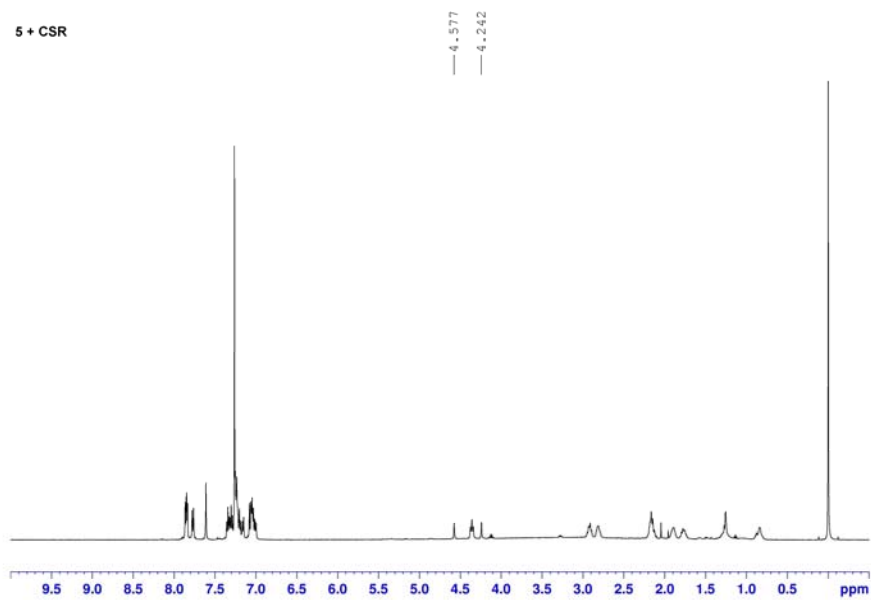

**Figure S17.  $^1\text{H}$  NMR Spectra of CSR and carboxylic acid 6**

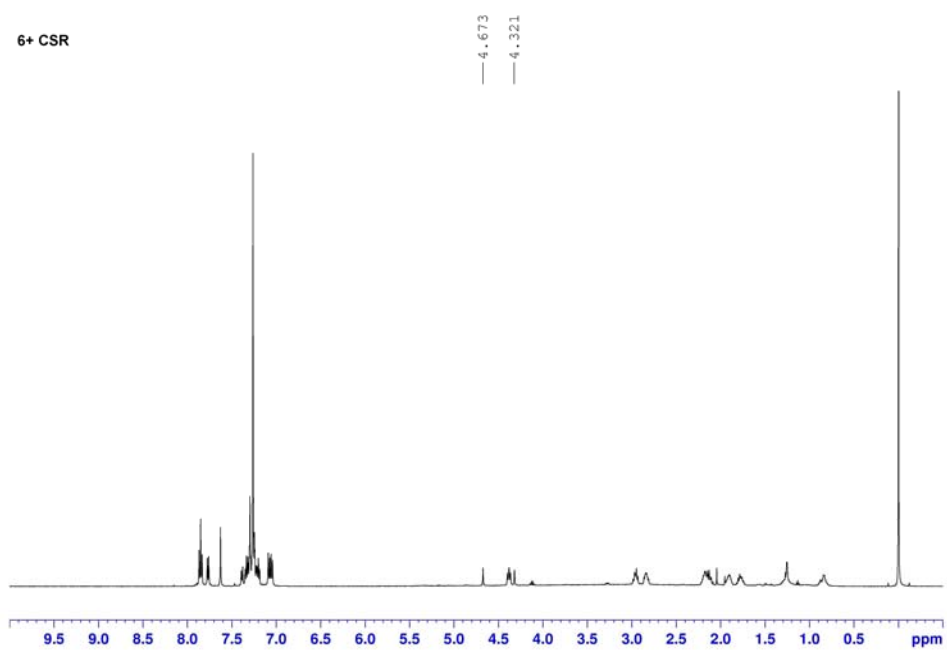

**Figure S18.  $^1\text{H}$  NMR Spectra of CSR and carboxylic acid 7**

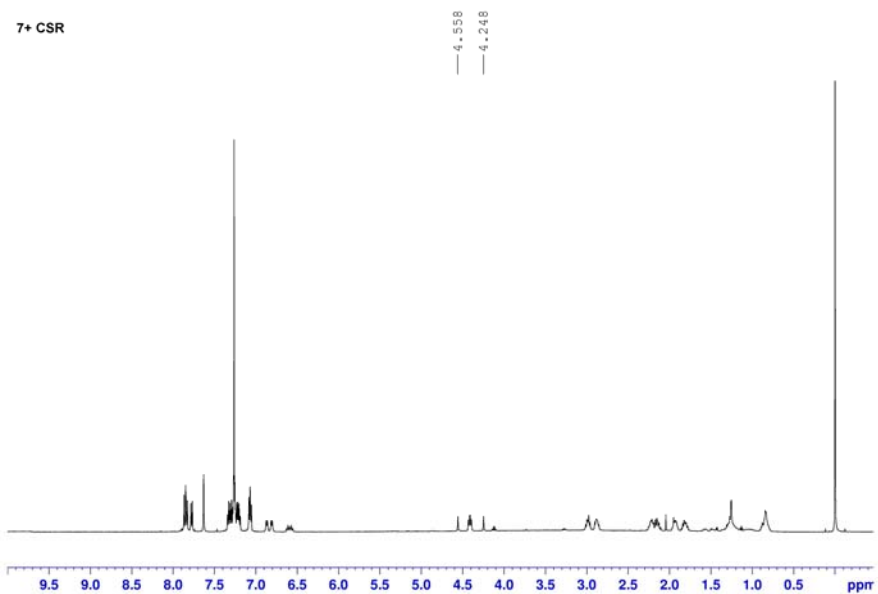





**Figure S21.  $^1\text{H}$  NMR Spectra of CSR and carboxylic acid 10**

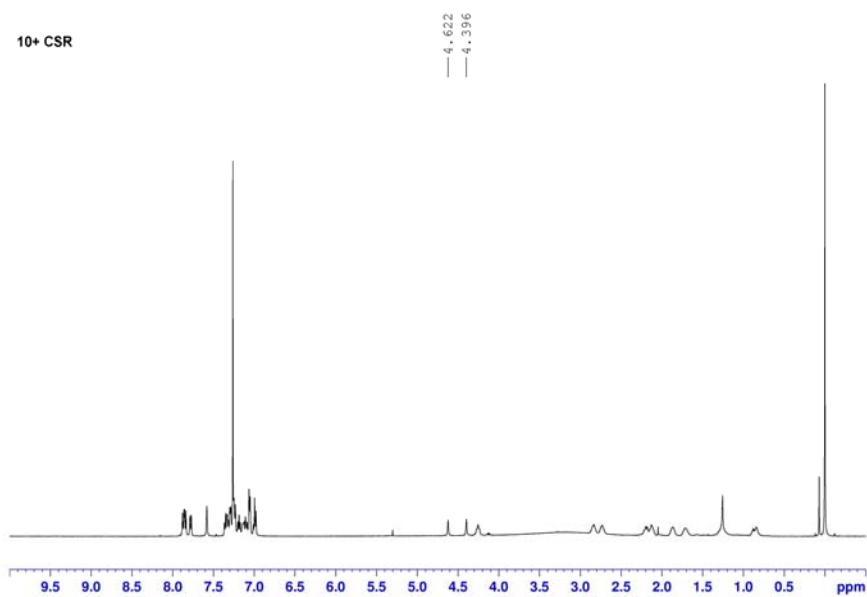

**Figure S22.  $^1\text{H}$  NMR Spectra of CSR and carboxylic acid 11**

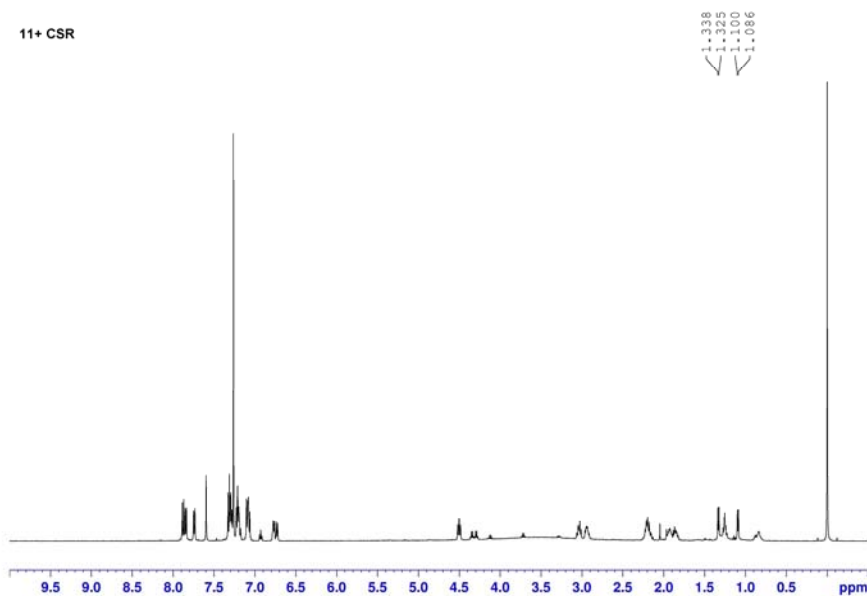

Figure S23.  $^1\text{H}$  NMR Spectra of CSR and carboxylic acid 12

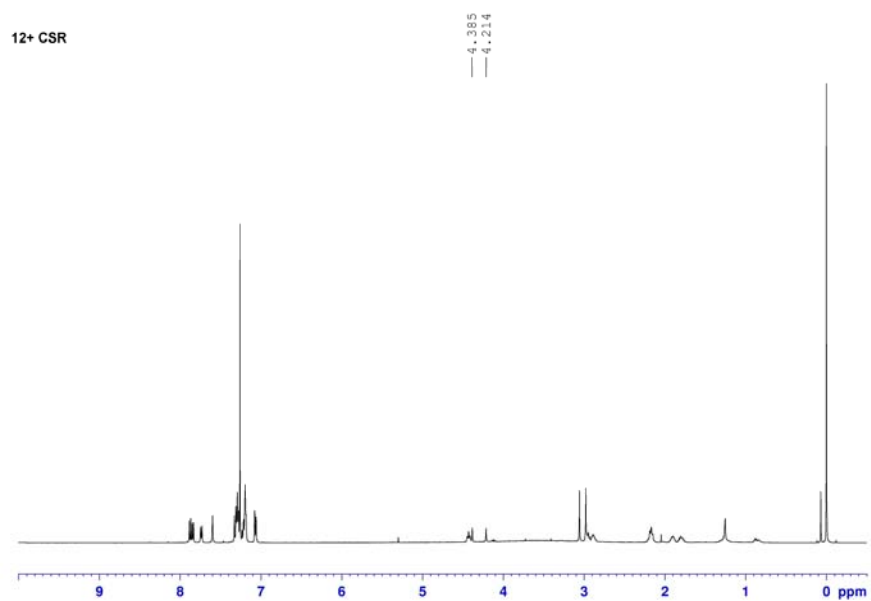

Figure S24.  $^1\text{H}$  NMR Spectra of CSR and carboxylic acid 13

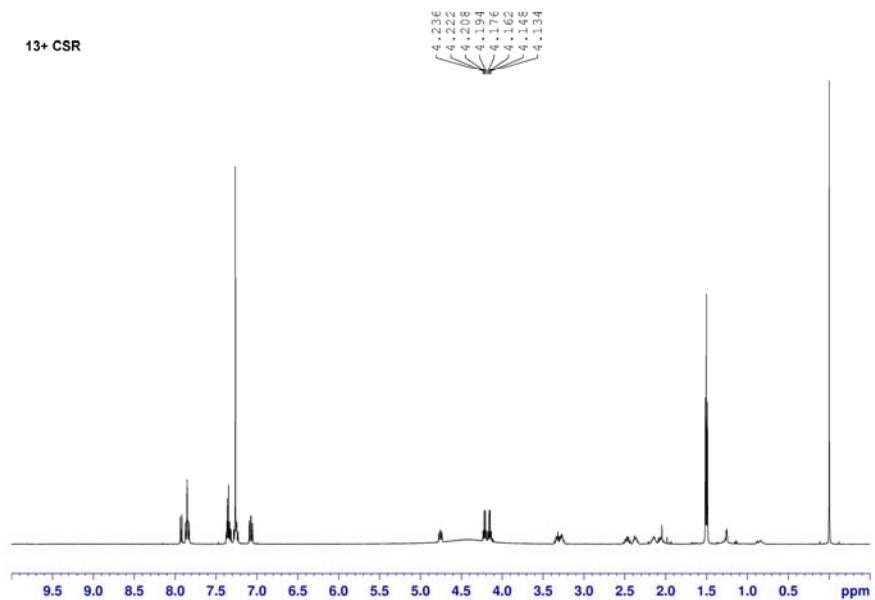

Supplement: Supplementary file 1 [file 4105150]
